# Supplementary material for: Synthesis, Biological Evaluation, and Pharmacokinetic Study of Novel Liguzinediol Prodrugs
Source: Molecules. 2013 Apr 18;18(4):4561–72. doi: 10.3390/molecules18044561 (PMC6270099; doi:10.3390/molecules18044561)

# Supplementary Materials

Compound 4

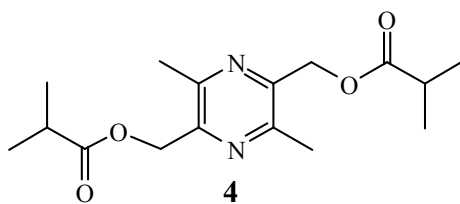

Figure S1. Compound 4  $^1\text{H}$ -NMR.

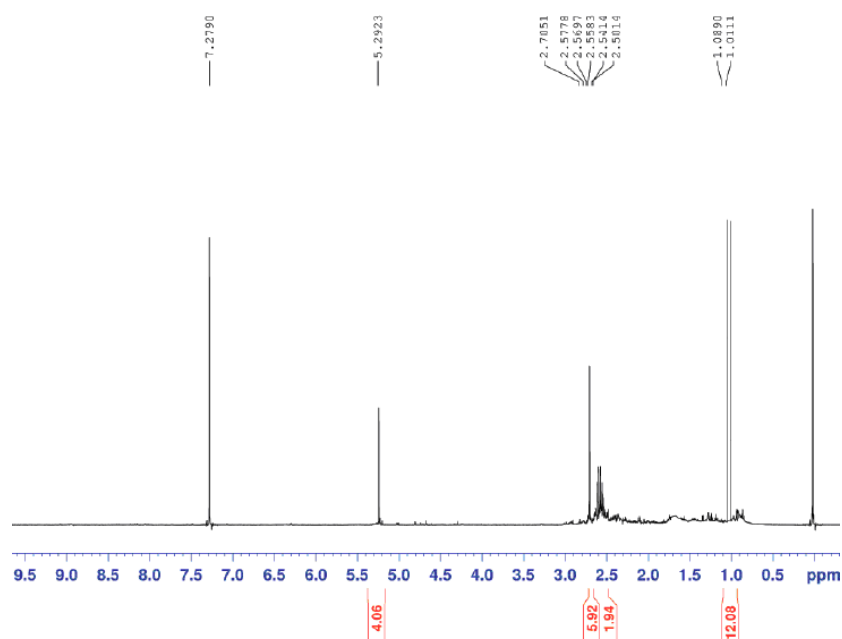

Figure S2. Compound 4  $^{13}\text{C}$ -NMR.

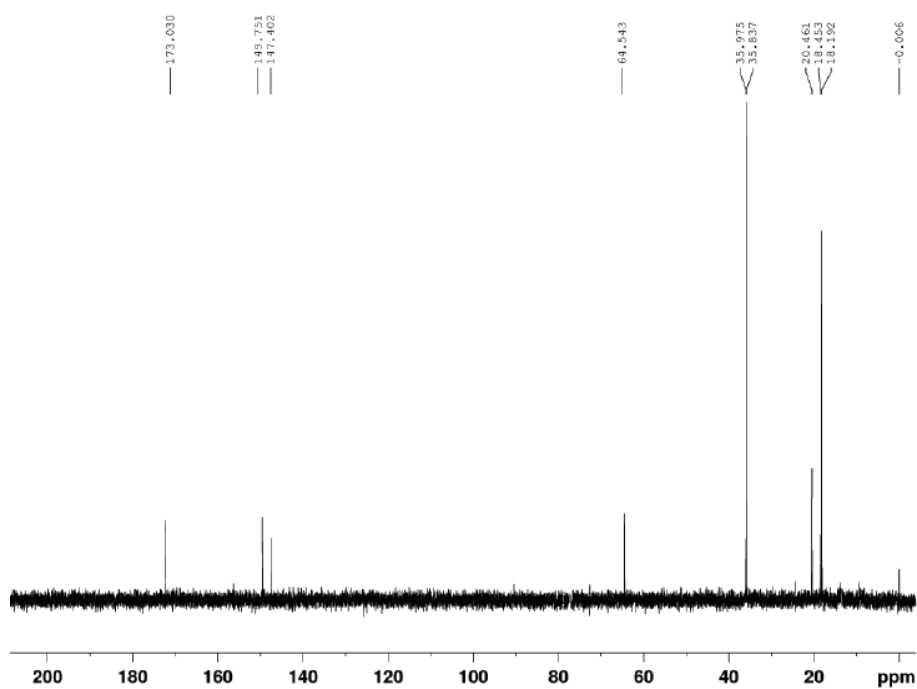

Figure S3. Compound 4 IR.

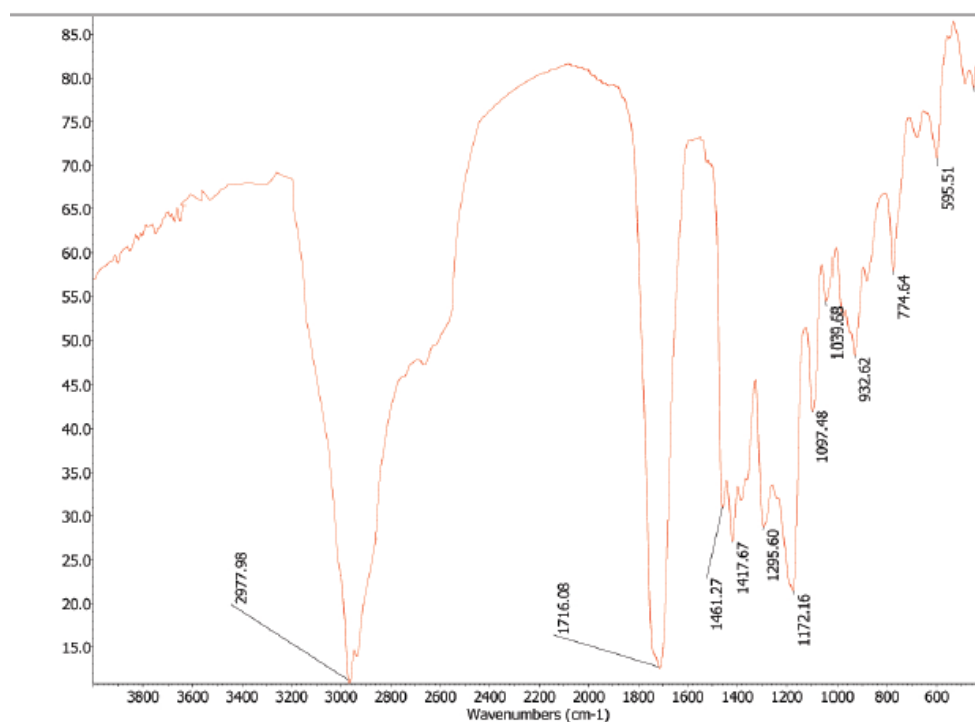

Figure S4. Compound 4 MS.

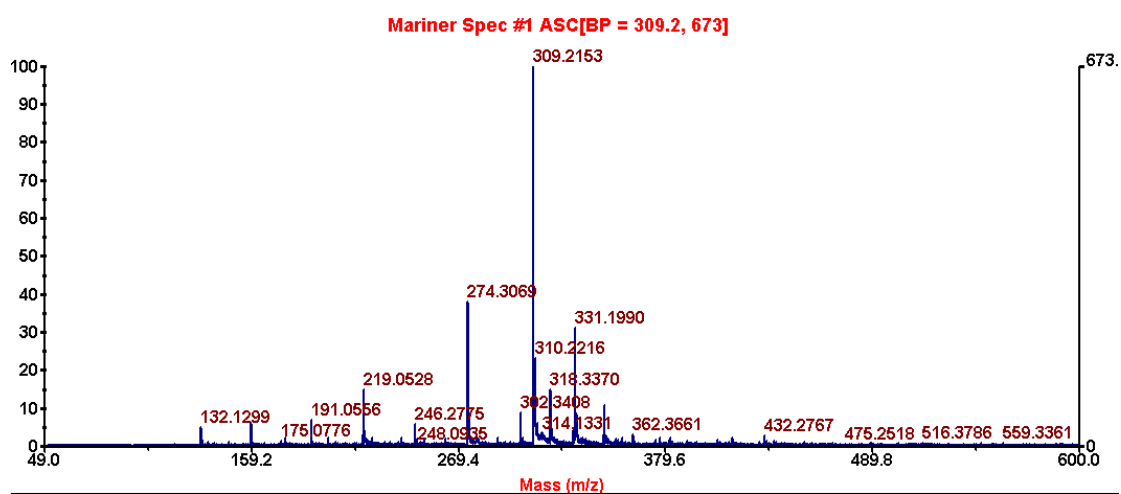



Figure S7. Compound 5 IR.

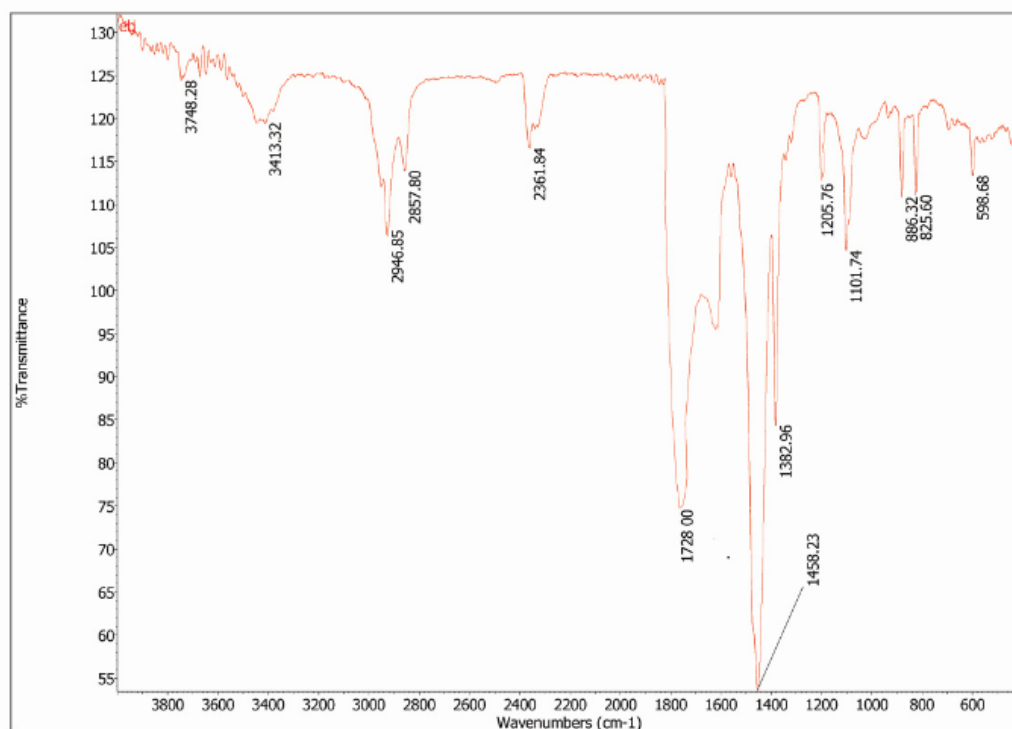

Figure S8. Compound 5 MS.

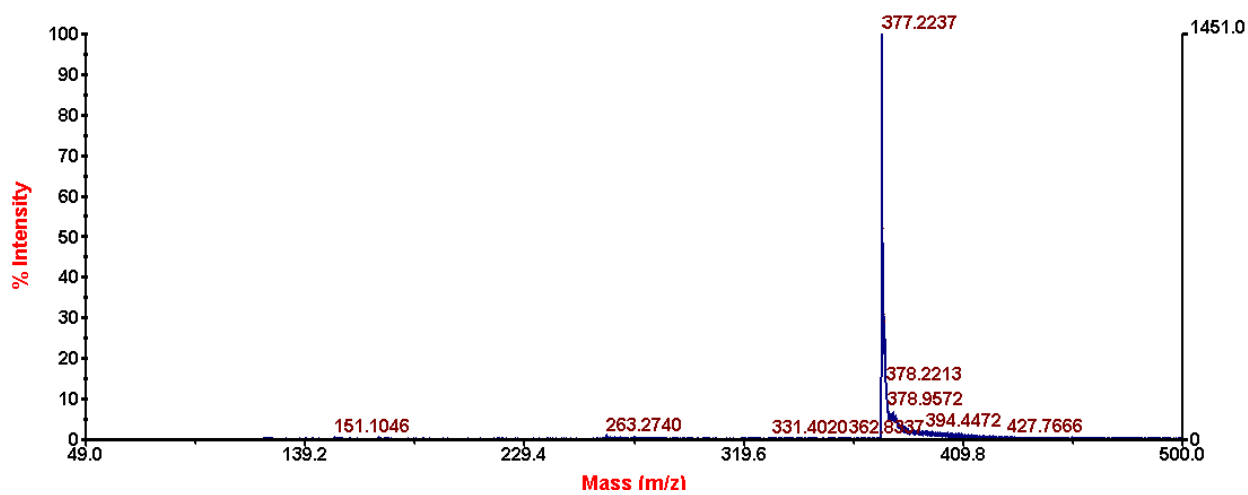

Supplement: Supplementary file 1 [file molecules-18-04561-s001.pdf]
